# Supplementary figures and images for: Refining Genotypes and Phenotypes in KCNA2-Related Neurological Disorders
Source: MDPI journal article supplement (doi:10.3390/ijms22062824), 2021-03-10

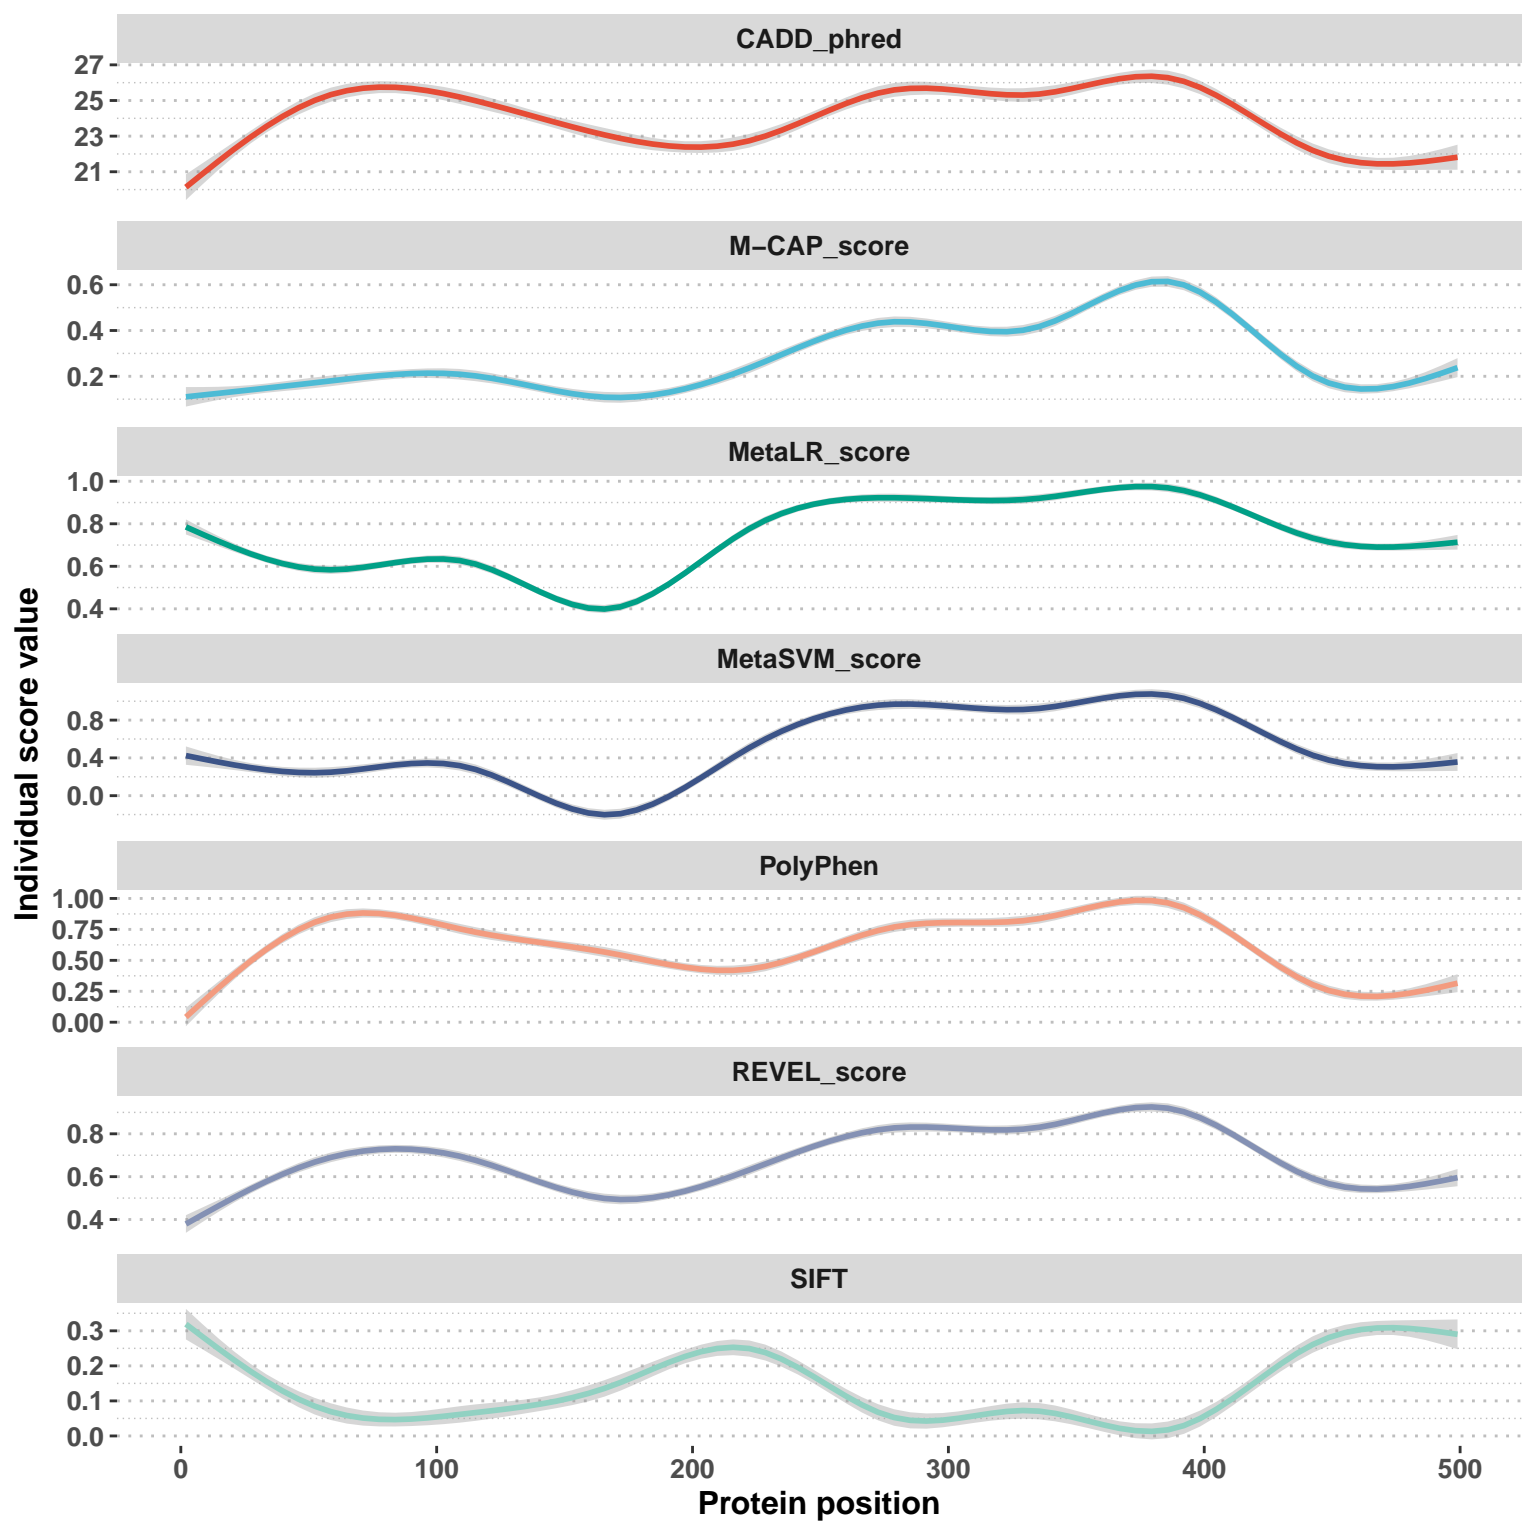

Supplement: s1 [file s1]
